# Supplementary material for: Bioabsorbable poly(4-hydroxybutyrate) (P4HB) fibrous membranes as a potential dermal substitute
Source: Royal Society of Chemistry journal article supplement (doi:10.1039/d1tb01271a), 2021-01-01
Supplement: d1tb01271a1.pdf [file d1tb01271a1.pdf]

## **Supporting Information**

### **Bioabsorbable Poly(4-hydroxybutyrate) (P4HB) Fibrous Membranes as a Potential Dermal Substitute**

Shuaishuai Yuan<sup>a,c</sup>, Xiuxia Sun<sup>b</sup>, Yong Shen<sup>b</sup>, Zhibo Li<sup>\*,a,b</sup>

<sup>a</sup> Key Lab of Biobased Polymer Materials of Shandong Provincial Education Department, College of Polymer Science and Engineering, Qingdao University of Science and Technology, Qingdao 266042, P.R. China.

<sup>b</sup> College of Chemical Engineering, Qingdao University of Science and Technology, Qingdao 266042, P.R. China.

<sup>c</sup> National Engineering Laboratory of Medical Implantable Devices & Key Laboratory for Medical Implantable Devices of Shandong Province, WEGO Holding Company Limited, Weihai 264210, P. R. China.

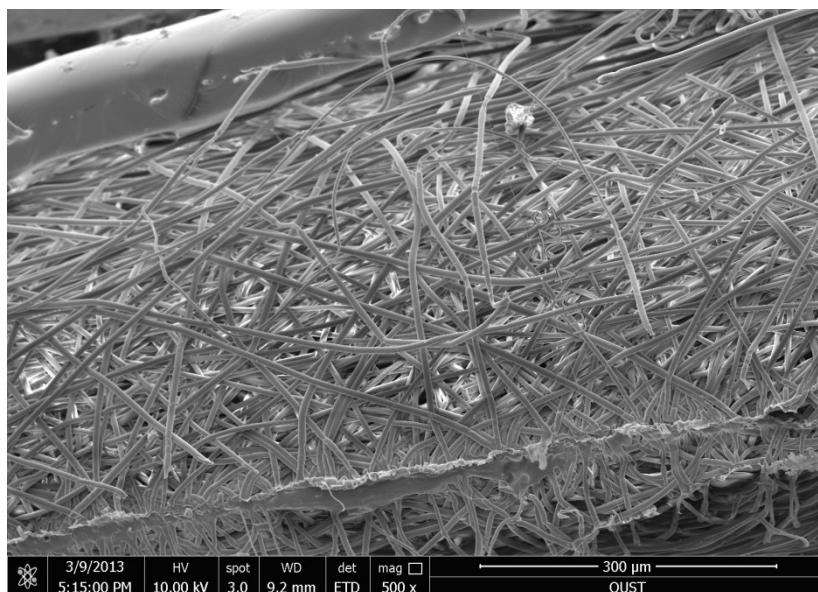

Figure S1. FESEM photograph of cross-section of P4HB-15.

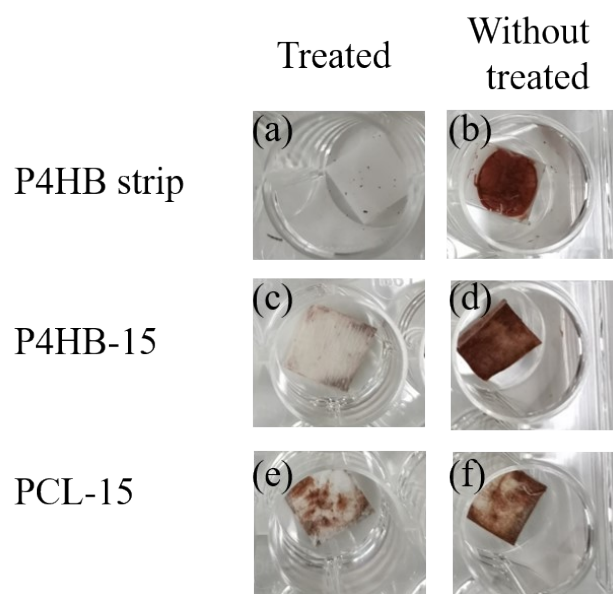

Figure S2. Image of the samples contacted with whole blood with (left) and without (right) PBS washing.

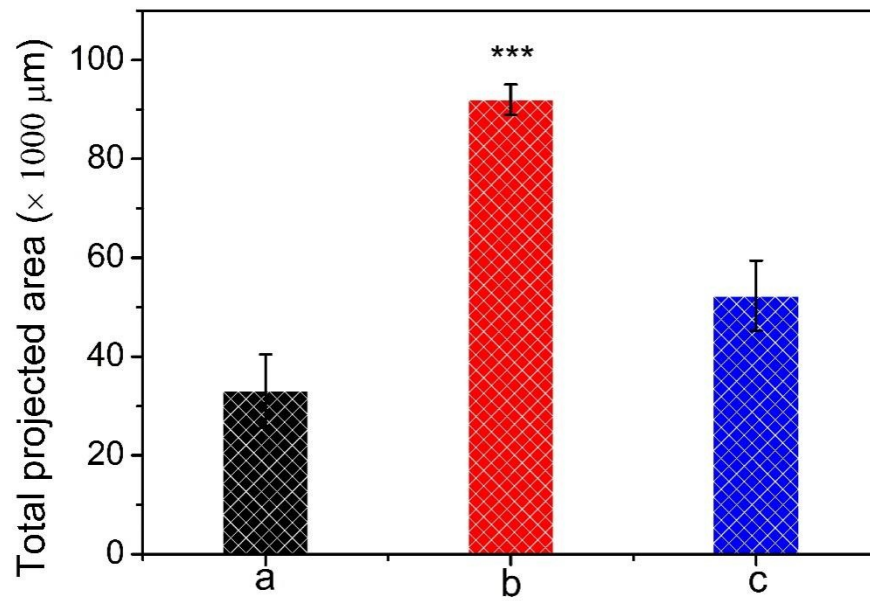

Figure S3. Quantification of total projected area of adherent HeLa cells on (a) P4HB strip; (b) P4HB-15 and (c) PCL-15 surfaces. Significant difference (\*\*  $p < 0.01$  and \*\*\*  $p < 0.001$ ) compared with the P4HB strip and PCL-15. (error bars: standard deviations,  $n = 3$ ).

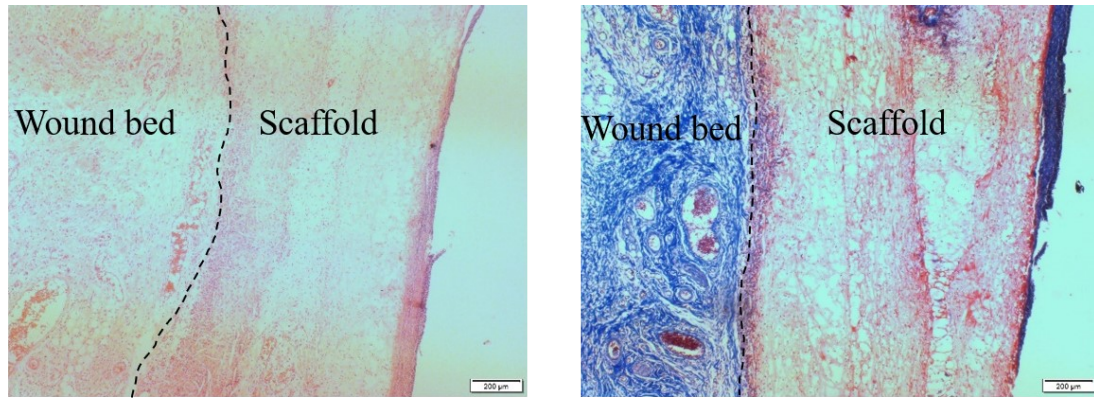

Figure S4. H&E (left) and Masson's Trichrome (right) staining images of the SD rats full-thickness wound treated with P4HB-15 membranes at 1 week. Scale bar = 200 µm.

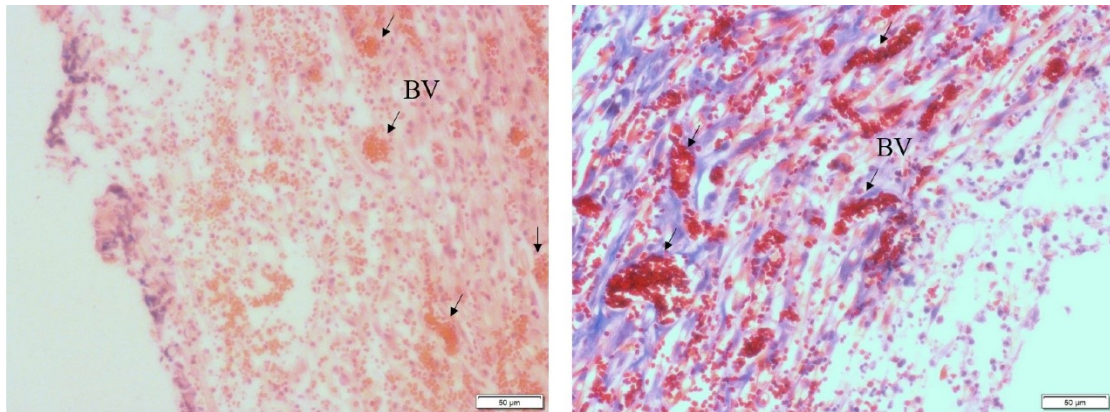

Figure S5. H&E (left) and Masson's Trichrome (right) staining images of the SD rats full-thickness wound treated with P4HB-15 membranes at 2 weeks. BV: blood vessel. Scale bar = 50  $\mu\text{m}$ .

Table S1. The porosity ratio of P4HB-15 and PCL-15 microfiber scaffolds.

| Sample  | Porosity (%)   |
|---------|----------------|
| P4HB-15 | $91.2 \pm 6.4$ |
| PCL-15  | $89.6 \pm 5.1$ |
